# Supplementary material for: Biohydrogen, Volatile Fatty Acids, and Biomethane from Mezcal Vinasses—A Dark Fermentation Process Evaluation
Source: MDPI journal article supplement (doi:10.3390/fermentation10040217), 2024-04-16
Supplement: s1 [file s1]

**Table S1.** Significant differences in COD removal efficiency (%) between the reaction times evaluated, based on a comparative Tukey test.

| Compared Reaction times (d) | Significant difference | 95% accuracy   | Significancy | Adjusted P value |
|-----------------------------|------------------------|----------------|--------------|------------------|
| 4 d vs. 3 d                 | 0.4803                 | -7.982 a 8.943 | No           | 0.9996           |
| 4 d vs. 2 d                 | 12.47                  | 4.004 a 20.93  | Yes          | 0.0061           |
| 4 d vs. 1 d                 | 14.66                  | 7.091 a 22.23  | Yes          | 0.0010           |
| 4 d vs. 0.5 d               | 14.87                  | 7.300 a 22.44  | Yes          | 0.0009           |
| 3 d vs. 2 d                 | 11.99                  | 2.716 a 21.26  | Yes          | 0.0131           |
| 3 d vs. 1 d                 | 14.18                  | 5.718 a 22.64  | Yes          | 0.0027           |
| 3 d vs. 0.5 d               | 14.39                  | 5.926 a 22.85  | Yes          | 0.0025           |
| 2 d vs. 1 d                 | 2.194                  | -6.269 a 10.66 | No           | 0.8909           |
| 2 d vs. 0.5 d               | 2.402                  | -6.061 a 10.86 | No           | 0.8569           |
| 1 d vs. 0.5 d               | 0.2082                 | -7.361 a 7.777 | No           | >0.9999          |

**Table S2.** Significant differences based on the production of volatile fatty acids (mg VFAL) between the reaction times evaluated, based on a comparative Tukey test.

| Compared Reaction times (d) | Significant difference | 95% accuracy   | Significancy | Adjusted P value |
|-----------------------------|------------------------|----------------|--------------|------------------|
| 4 d vs. 3 d                 | -1767                  | -2661 a -872.2 | Yes          | 0.0013           |
| 4 d vs. 2 d                 | -824.0                 | -1804 a 155.8  | No           | 0.1023           |
| 4 d vs. 1 d                 | -1028                  | -1922 a -133.6 | Yes          | 0.0261           |
| 4 d vs. 0.5 d               | -1796                  | -2776 a -816.2 | Yes          | 0.0020           |
| 3 d vs. 2 d                 | 942.7                  | 48.24 a 1837   | Yes          | 0.0394           |
| 3 d vs. 1 d                 | 738.7                  | -61.34 a 1539  | No           | 0.0705           |
| 3 d vs. 0.5 d               | -29.33                 | -923.8 a 865.1 | No           | >0.9999          |
| 2 d vs. 1 d                 | -204.0                 | -1098 a 690.4  | No           | 0.9175           |
| 2 d vs. 0.5 d               | -972.0                 | -1952 a 7.800  | No           | 0.0518           |
| 1 d vs. 0.5 d               | -768.0                 | -1662 a 126.4  | No           | 0.0944           |

**Table S3.** Significant differences based on the production efficiency of volatile fatty acids (%) between the reaction times (RT) evaluated, based on a comparative Tukey test.

| Compared Reaction times (d) | Significant difference | 95% accuracy    | Significancy | Adjusted P value |
|-----------------------------|------------------------|-----------------|--------------|------------------|
| 4 d vs. 3 d                 | -31.77                 | -55.18 a -8.368 | Yes          | 0.0111           |
| 4 d vs. 2 d                 | -15.02                 | -40.65 a 10.62  | No           | 0.3171           |
| 4 d vs. 1 d                 | -21.66                 | -45.07 a 1.743  | No           | 0.0698           |
| 4 d vs. 0.5 d               | -34.46                 | -60.09 a -8.817 | Yes          | 0.0117           |
| 3 d vs. 2 d                 | 16.76                  | -6.647 a 40.16  | No           | 0.1799           |
| 3 d vs. 1 d                 | 10.11                  | -10.82 a 31.04  | No           | 0.4754           |
| 3 d vs. 0.5 d               | -2.682                 | -26.09 a 20.72  | No           | 0.9927           |
| 2 d vs. 1d                  | -6.646                 | -30.05 a 16.76  | No           | 0.8408           |
| 2 d vs. 0.5 d               | -19.44                 | -45.08 a 6.199  | No           | 0.1488           |
| 1 d vs. 0.5 d               | -12.79                 | -36.20 a 10.61  | No           | 0.3721           |

**Table S4.** Significant differences based on the maximum generation of volatile fatty acids (mg VFA/L) between the reaction times evaluated, based on a comparative Tukey test.

| Compared Reaction times (d) | Significant difference | 95% accuracy | Significancy | Adjusted P value |
|-----------------------------|------------------------|--------------|--------------|------------------|
| 4 d vs. 3 d                 | 330.0                  | -1677 a 2337 | No           | 0.9726           |
| 4 d vs. 2 d                 | -262.0                 | -2460 a 1936 | No           | 0.9915           |
| 4 d vs. 1 d                 | -160.7                 | -2167 a 1846 | No           | 0.9982           |
| 4 d vs. 0.5 d               | -366.0                 | -2564 a 1832 | No           | 0.9714           |
| 3 d vs. 2 d                 | -592.0                 | -2599 a 1415 | No           | 0.8229           |
| 3 d vs. 1 d                 | -490.7                 | -2285 a 1304 | No           | 0.8571           |
| 3 d vs. 0.5 d               | -696.0                 | -2703 a 1311 | No           | 0.7311           |
| 2 d vs. 1 d                 | 101.3                  | -1905 a 2108 | No           | 0.9997           |
| 2 d vs. 0.5 d               | -104.0                 | -2302 a 2094 | No           | 0.9998           |
| 1 d vs. 0.5 d               | -205.3                 | -2212 a 1801 | No           | 0.9952           |

**Table S5.** Significant differences based on the maximum production efficiency of volatile fatty acids (%) between the reaction times evaluated, based on a comparative Tukey test.

| Compared Reaction times (d) | Significant difference | 95% accuracy   | Significancy | Adjusted P value |
|-----------------------------|------------------------|----------------|--------------|------------------|
| 4 d vs. 3 d                 | -5.398                 | -31.75 a 20.96 | No           | 0.9310           |
| 4 d vs. 2 d                 | -2.647                 | -29.00 a 23.71 | No           | 0.9945           |
| 4 d vs. 1 d                 | -14.28                 | -38.34 a 9.778 | No           | 0.2849           |
| 4 d vs. 0.5 d               | -15.51                 | -41.86 a 10.85 | No           | 0.2910           |
| 3 d vs. 2 d                 | 2.751                  | -23.60 a 29.11 | No           | 0.9937           |
| 3 d vs. 1 d                 | -8.882                 | -32.94 a 15.18 | No           | 0.6571           |
| 3 d vs. 0.5 d               | -10.11                 | -36.47 a 16.24 | No           | 0.6287           |
| 2 d vs. 1 d                 | -11.63                 | -35.69 a 12.43 | No           | 0.4436           |
| 2 d vs. 0.5 d               | -12.86                 | -39.22 a 13.49 | No           | 0.4361           |
| 1 d vs. 0.5 d               | -1.229                 | -25.29 a 22.83 | No           | 0.9996           |

**Table S6.** Significant differences depending on the accumulated biogas production (NmL/L<sub>reactor</sub>) between the reaction times (RT) evaluated, based on a comparative Tukey test

| Compared Reaction times (d) | Significant difference | 95% accuracy    | Significancy | Adjusted P value |
|-----------------------------|------------------------|-----------------|--------------|------------------|
| 4 d vs. 3 d                 | -126.7                 | -227.7 a -25.62 | Yes          | 0.0138           |
| 4 d vs. 2 d                 | -62.50                 | -173.2 a 48.19  | No           | 0.3955           |
| 4 d vs. 1 d                 | -111.1                 | -212.2 a -10.06 | Yes          | 0.0301           |
| 4 d vs. 0.5 d               | -176.0                 | -268.6 a -83.39 | Yes          | 0.0007           |
| 3 d vs. 2 d                 | 64.17                  | -36.88 a 165.2  | No           | 0.2950           |
| 3 d vs. 1 d                 | 15.56                  | -74.82 a 105.9  | No           | 0.9771           |
| 3 d vs. 0.5 d               | -49.33                 | -130.2 a 31.50  | No           | 0.3280           |
| 2 d vs. 1 d                 | -48.61                 | -149.7 a 52.44  | No           | 0.5381           |

|               |        |                 |     |        |
|---------------|--------|-----------------|-----|--------|
| 2 d vs. 0.5 d | -113.5 | -206.1 a -20.89 | Yes | 0.0159 |
| 1 d vs. 0.5 d | -64.89 | -145.7 a 15.95  | No  | 0.1350 |

---
